# Supplementary material for: Delphi Study to Reach International Consensus Among Vascular Surgeons on Major Arterial Vascular Surgical Complications
Source: Springer Nature journal article supplement (doi:10.1007/s00268-019-05038-3), 2019-06-10
Supplement: MOESM1 [file 16786866]

## Appendix A: Lists of complications

| Level | Complication list AAA                                                                                                       |
|-------|-----------------------------------------------------------------------------------------------------------------------------|
| 1     | Elevated troponin levels requiring surveillance by a cardiologist                                                           |
| 2     | Acute myocardial infarction requiring percutaneous coronary intervention                                                    |
| 3     | Acute myocardial infarction requiring resuscitation                                                                         |
| 1     | Allergic reaction (due to contrast allergy) requiring to abort treatment and start medication                               |
| 2     | Allergic reaction (due to contrast allergy) requiring to abort treatment and ventilator support                             |
| 2     | Aneurysm rupture requiring endovascular surgical re-intervention                                                            |
| 3     | Aneurysm rupture requiring open surgical repair                                                                             |
| 1     | Bowel ischemia requiring no additional support                                                                              |
| 2     | Bowel ischemia requiring temporary total parenteral nutrition                                                               |
| 3     | Bowel ischemia requiring bowel resection                                                                                    |
| 1     | Buttock claudication requiring no additional support                                                                        |
| 2     | Buttock claudication requiring long-term use of analgesics                                                                  |
| 3     | Buttock claudication requiring surgical intervention                                                                        |
| 1     | Congestive heart failure requiring no additional support                                                                    |
| 2     | Congestive heart failure requiring permanent medication                                                                     |
| 3     | Congestive heart failure requiring resuscitation                                                                            |
| 2     | Deep venous thrombosis requiring long-term anticoagulant therapy                                                            |
| 3     | Deep venous thrombosis requiring lytic therapy                                                                              |
| 1     | Superficial wound infection requiring oral antibiotics                                                                      |
| 2     | Superficial wound infection requiring opening of the wound at bedside                                                       |
| 3     | Deep wound infection requiring surgical debridement                                                                         |
| 1     | De novo or worsened peripheral artery disease requiring medicinal support                                                   |
| 2     | De novo or worsened peripheral artery disease requiring intervention                                                        |
| 2     | Endoleak type 1 requiring secondary endovascular treatment                                                                  |
| 3     | Endoleak type 1 requiring explantation and open repair                                                                      |
| 1     | Endoleak type 2 resolved after 6 months                                                                                     |
| 2     | Endoleak type 2 with no evidence of aneurysm expansion requiring additional follow-up imaging                               |
| 3     | Endoleak type 2 requiring secondary endovascular treatment                                                                  |
| 2     | Endoleak type 3 requiring secondary endovascular treatment                                                                  |
| 3     | Endoleak type 3 requiring explantation and open repair                                                                      |
| 1     | Erectile dysfunction with spontaneous recovery within 6 months                                                              |
| 2     | Erectile dysfunction functional with medical therapy                                                                        |
| 3     | Erectile dysfunction requiring penile implant                                                                               |
| 1     | Hemorrhage requiring 1 blood transfusion                                                                                    |
| 2     | Hemorrhage requiring both blood transfusion and local surgical intervention for control                                     |
| 3     | Hemorrhage requiring both massive transfusion and laparotomy                                                                |
| 1     | Incisional hernia requiring a hernia support belt                                                                           |
| 2     | Incisional hernia requiring surgical repair                                                                                 |
| 2     | Pulmonary embolism requiring anticoagulant therapy                                                                          |
| 3     | Pulmonary embolism requiring surgical therapy due to hemodynamic instability                                                |
| 1     | Pulmonary infection requiring oral antibiotics                                                                              |
| 2     | Pulmonary infection requiring IV antibiotics                                                                                |
| 3     | Pulmonary infection requiring ventilator support                                                                            |
| 1     | Renal insufficiency requiring surveillance by a nephrologist                                                                |
| 2     | Renal failure requiring temporary dialysis with permanently reduced renal function requiring surveillance by a nephrologist |
| 3     | Renal failure requiring permanent dialysis                                                                                  |

|   |                                                                                                                  |
|---|------------------------------------------------------------------------------------------------------------------|
| 2 | Sepsis based on a positive blood culture requiring IV antibiotics and monitoring on the surgical ward            |
| 3 | Sepsis based on a positive blood culture requiring IV antibiotics and ICU support due to hemodynamic instability |
| 1 | Spinal cord ischemia resolved within 24 hours                                                                    |
| 2 | Spinal cord ischemia regaining the ability to walk without support within 1 month                                |
| 3 | Spinal cord ischemia with permanent paraplegia                                                                   |
| 1 | Transient ischemic attack requiring no additional treatment                                                      |
| 2 | Stroke with permanent deficit but the ability to walk without support                                            |
| 3 | Stroke with permanent severe impairment and inability to live independently                                      |
| 2 | Thrombo-embolic event requiring minor toe or foot amputation                                                     |
| 3 | Thrombo-embolic event requiring lytic therapy                                                                    |
| 3 | Vascular graft limb thrombosis requiring fem-fem crossover surgery                                               |
| 1 | Urinary retention requiring one-time catheterization                                                             |
| 2 | Urinary retention requiring intravesical catheter for 2 weeks                                                    |
| 3 | Urinary retention requiring permanent intermittent self-catheterization                                          |
| 2 | Vascular graft infection controlled with antibiotics                                                             |
| 3 | Vascular graft infection requiring graft removal with in situ repair                                             |
| 1 | Vascular graft migration requiring no additional intervention                                                    |
| 2 | Vascular graft migration requiring secondary endovascular treatment                                              |
| 3 | Vascular graft migration requiring explantation and open repair                                                  |
| 1 | Vascular graft technical deployment problem without conversion                                                   |
| 2 | Vascular graft technical deployment problem requiring conversion to open surgery                                 |
| 3 | Vascular graft technical deployment problem with permanent disability and inability to live independently        |
| 1 | Wound hematoma with spontaneous resolution                                                                       |
| 2 | Wound hematoma requiring surgical evacuation                                                                     |
| 3 | Wound hematoma with nerve compression requiring arterial repair                                                  |
| 1 | Arterial access site pseudoaneurysm requiring no additional intervention                                         |
| 2 | Arterial access site pseudoaneurysm requiring thrombin injection                                                 |
| 3 | Arterial access site pseudoaneurysm requiring surgical repair                                                    |
| 2 | Ureteral lesion causing a urinoma requiring percutaneous drainage                                                |
| 3 | Ureteral lesion requiring surgical repair                                                                        |
| 2 | Bowel lesion requiring primary closure or anastomosis                                                            |
| 3 | Bowel lesion requiring a colostomy                                                                               |

First column: 1 = mild level of severity, 2 = moderate level of severity, 3 = severe level of severity.

Second column: complications divided in levels of severity.

| Level | Complication list CAD                                                                                                        |
|-------|------------------------------------------------------------------------------------------------------------------------------|
| 1     | Elevated troponin levels requiring surveillance by a cardiologist                                                            |
| 2     | Acute myocardial infarction requiring percutaneous coronary intervention                                                     |
| 3     | Acute myocardial infarction requiring resuscitation                                                                          |
| 1     | Allergic reaction (due to contrast allergy) requiring to abort treatment and start medication                                |
| 2     | Allergic reaction (due to contrast allergy) requiring to abort treatment and ventilator support                              |
| 1     | Arterial access site arteriovenous fistula requiring no additional treatment                                                 |
| 2     | Arterial access site arteriovenous fistula formation requiring endovascular repair                                           |
| 3     | Arterial access site arteriovenous fistula formation requiring surgical repair                                               |
| 1     | Arterial access site pseudoaneurysm requiring no additional treatment                                                        |
| 2     | Arterial access site pseudoaneurysm requiring thrombin injection                                                             |
| 3     | Arterial access site pseudoaneurysm requiring surgical repair                                                                |
| 1     | Bradycardia resolved within 24 hours                                                                                         |
| 2     | Bradycardia requiring short-term medicinal support                                                                           |
| 3     | Bradycardia requiring pacemaker implantation                                                                                 |
| 1     | Cardiac arrhythmias with spontaneous resolution                                                                              |
| 2     | Cardiac arrhythmias requiring permanent anticoagulant therapy                                                                |
| 3     | Cardiac arrhythmias requiring cardioversion                                                                                  |
| 1     | Congestive heart failure requiring no additional support                                                                     |
| 2     | Congestive heart failure requiring permanent medication                                                                      |
| 3     | Congestive heart failure requiring resuscitation                                                                             |
| 2     | Deep venous thrombosis requiring long-term anticoagulant therapy                                                             |
| 3     | Deep venous thrombosis requiring lytic therapy                                                                               |
| 1     | Superficial wound infection requiring oral antibiotics                                                                       |
| 2     | Superficial wound infection requiring opening of the wound at bedside                                                        |
| 3     | Deep wound infection requiring surgical debridement                                                                          |
| 1     | De novo or worsened peripheral artery disease requiring medicinal support                                                    |
| 2     | De novo or worsened peripheral artery disease requiring intervention                                                         |
| 3     | De novo or worsened peripheral artery disease requiring below-knee amputation                                                |
| 1     | Dissection requiring no additional intervention                                                                              |
| 2     | Dissection requiring endovascular repair                                                                                     |
| 3     | Dissection requiring open repair                                                                                             |
| 1     | Hypertension resolved within 24 hours                                                                                        |
| 2     | Hypertension requiring medicinal support                                                                                     |
| 3     | Hyperperfusion syndrome requiring intensive monitor surveillance on brain care unit                                          |
| 1     | Ipsilateral non-disabling stroke causing prolonged hospital stay                                                             |
| 2     | Ipsilateral disabling stroke with permanent deficit with mild impairment                                                     |
| 3     | Ipsilateral disabling stroke with permanent severe impairment and inability to live independently                            |
| 2     | Embolic or hemodynamic stroke resulting in mild or temporary cognitive function impairment                                   |
| 1     | Transient nerve palsy causing numbness of face/neck area                                                                     |
| 2     | Persistent but not disabling cranial nerve palsy requiring speech therapy                                                    |
| 3     | Persistent disabling cranial nerve palsy with difficulty to eat and speak                                                    |
| 2     | Pulmonary embolism requiring anticoagulant therapy                                                                           |
| 3     | Pulmonary embolism requiring surgical therapy due to hemodynamic instability                                                 |
| 1     | Pulmonary infection requiring oral antibiotics                                                                               |
| 2     | Pulmonary infection requiring IV antibiotics                                                                                 |
| 3     | Pulmonary infection requiring ventilator support                                                                             |
| 1     | Renal insufficiency requiring surveillance by a nephrologist.                                                                |
| 2     | Renal failure requiring temporary dialysis with permanently reduced renal function requiring surveillance by a nephrologist. |

|   |                                                                                                                           |
|---|---------------------------------------------------------------------------------------------------------------------------|
| 3 | Renal failure requiring permanent dialysis                                                                                |
| 1 | Retroperitoneal hemorrhage without the need for blood transfusion                                                         |
| 2 | Retroperitoneal hemorrhage requiring both blood transfusion and limited surgical or endovascular intervention for control |
| 3 | Retroperitoneal hemorrhage requiring massive transfusion and major open surgical intervention                             |
| 2 | Sepsis requiring IV antibiotics                                                                                           |
| 3 | Sepsis based on a positive blood culture requiring IV antibiotics and ICU support due to hemodynamic instability          |
| 1 | Technical failure without conversion                                                                                      |
| 2 | Technical failure leading to conversion to open surgery                                                                   |
| 3 | Technical failure with permanent disability and inability to live independently                                           |
| 1 | Transient ischemic attack not requiring prolonged hospital stay                                                           |
| 2 | Transient ischemic attack requiring prolonged hospital stay                                                               |
| 1 | Transposition of stent without conversion                                                                                 |
| 2 | Transposition of stent requiring open surgery                                                                             |
| 3 | Transposition of stent with permanent disability and inability to live independently                                      |
| 1 | Wound hematoma requiring prolonged compression                                                                            |
| 2 | Respiratory distress due to neck hematoma requiring surgical evacuation                                                   |
| 3 | Wound hematoma with nerve compression or cervical blow-out requiring arterial repair                                      |
| 2 | Patch infection controlled with antibiotics                                                                               |
| 3 | Patch infection requiring vascular reconstruction                                                                         |
| 1 | Carotid artery re-stenosis or occlusion asymptomatic requiring no additional intervention                                 |
| 2 | Carotid artery re-stenosis or occlusion with TIA/minor stroke requiring endovascular or open re-intervention              |
| 3 | Carotid artery re-stenosis or occlusion with major stroke                                                                 |
| 1 | Contrast encephalopathy resolved within 24 hours                                                                          |
| 2 | Contrast encephalopathy resulting in temporary cognitive function impairment                                              |
| 3 | Contrast encephalopathy with permanent disability and inability to live independently                                     |

First column: 1 = mild level of severity, 2 = moderate level of severity, 3 = severe level of severity.

Second column: complications divided in levels of severity.

| Level | Complication list PAD                                                                                                        |
|-------|------------------------------------------------------------------------------------------------------------------------------|
| 2     | Acute limb ischemia due to distal embolization requiring lytic therapy                                                       |
| 2     | Acute limb ischemia requiring below-knee amputation                                                                          |
| 3     | Acute limb or worsened ischemia requiring above-knee amputation                                                              |
| 1     | Elevated troponin levels requiring surveillance by a cardiologist                                                            |
| 2     | Acute myocardial infarction requiring percutaneous coronary intervention                                                     |
| 3     | Acute myocardial infarction requiring resuscitation or coronary artery bypass graft surgery                                  |
| 1     | Allergic reaction (due to contrast allergy) requiring to abort treatment and start medication                                |
| 2     | Allergic reaction (due to contrast allergy) requiring to abort treatment and ventilator support                              |
| 1     | Arteriovenous fistula at puncture site requiring no additional intervention                                                  |
| 2     | Arteriovenous fistula at puncture site requiring endovascular repair                                                         |
| 3     | Arteriovenous fistula at puncture site requiring surgical repair                                                             |
| 1     | Cardiac arrhythmias with spontaneous resolution                                                                              |
| 2     | Cardiac arrhythmias requiring life-long anti-coagulant therapy                                                               |
| 3     | Cardiac arrhythmias requiring cardioversion                                                                                  |
| 1     | Congestive heart failure requiring no additional support                                                                     |
| 2     | Congestive heart failure requiring diuretics                                                                                 |
| 3     | Congestive heart failure requiring resuscitation                                                                             |
| 1     | Renal insufficiency requiring surveillance by a nephrologist.                                                                |
| 2     | Renal failure requiring temporary dialysis with permanently reduced renal function requiring surveillance by a nephrologist. |
| 3     | Renal failure requiring permanent dialysis                                                                                   |
| 2     | Deep venous thrombosis requiring long-term anticoagulant therapy                                                             |
| 3     | Deep venous thrombosis requiring lytic therapy                                                                               |
| 1     | Superficial wound infection requiring oral antibiotics                                                                       |
| 2     | Superficial wound infection requiring opening of the wound at bedside                                                        |
| 3     | Deep wound infection requiring surgical debridement                                                                          |
| 1     | Dissection requiring no additional intervention                                                                              |
| 2     | Dissection requiring endovascular repair                                                                                     |
| 3     | Dissection requiring open repair                                                                                             |
| 1     | Femoral pseudo-aneurysm at puncture site requiring no additional intervention                                                |
| 2     | Femoral pseudo-aneurysm at puncture site requiring thrombin injection                                                        |
| 3     | Femoral pseudo-aneurysm at puncture site requiring endovascular or surgical repair                                           |
| 2     | Vascular graft infection controlled with antibiotics                                                                         |
| 3     | Vascular graft infection requiring vascular reconstruction                                                                   |
| 1     | Hemorrhage requiring 1 blood transfusion                                                                                     |
| 2     | Hemorrhage requiring both blood transfusion and limited surgical or endovascular intervention for control                    |
| 3     | Hemorrhage requiring both massive transfusion and extensive surgical intervention                                            |
| 1     | Lymphocele or lymphorrhea resolution without aspiration                                                                      |
| 2     | Lymphocele requiring drainage or lymphorrhea                                                                                 |
| 3     | Lymphocele or lymphorrhea with permanent debilitating edema or continuous lymphorrhea                                        |
| 2     | No improvement after treatment requiring re-intervention                                                                     |
| 3     | Worsened peripheral artery disease requiring above-knee amputation                                                           |
| 2     | Pulmonary embolism requiring anticoagulant therapy                                                                           |
| 3     | Pulmonary embolism requiring surgical therapy due to hemodynamic instability                                                 |
| 1     | Pulmonary infection requiring oral antibiotics                                                                               |
| 2     | Pulmonary infection requiring IV antibiotics                                                                                 |
| 3     | Pulmonary infection requiring ventilator support 20                                                                          |
| 2     | Sepsis requiring IV antibiotics                                                                                              |

|   |                                                                                                                  |
|---|------------------------------------------------------------------------------------------------------------------|
| 3 | Sepsis based on a positive blood culture requiring IV antibiotics and ICU support due to hemodynamic instability |
| 1 | Transient ischemic attack not requiring prolonged hospital stay                                                  |
| 2 | Transient ischemic attack requiring prolonged hospital stay                                                      |
| 2 | Stroke with permanent deficit but the ability to walk without support                                            |
| 3 | Stroke with permanent severe impairment inability to live independently                                          |
| 1 | Wound hematoma with spontaneous resolution                                                                       |
| 2 | Wound hematoma requiring surgical evacuation                                                                     |
| 3 | Wound hematoma with nerve compression requiring arterial repair                                                  |
| 1 | Decubitus requiring frequent patient repositioning and local wound care                                          |
| 2 | Decubitus requiring surgical debridement                                                                         |
| 3 | Decubitus requiring flap reconstruction                                                                          |
| 1 | Transient loss of sensibility on medial side or lower leg                                                        |
| 2 | Permanent loss of sensibility on medial side or lower leg                                                        |
| 1 | Artery re-stenosis or occlusion asymptomatic requiring no additional intervention                                |
| 2 | Artery re-stenosis or occlusion with ischemic rest pain requiring endovascular or open re-intervention           |
| 3 | Artery re-stenosis or occlusion requiring below-knee amputation                                                  |
| 1 | Aneurysm formation requiring observation                                                                         |
| 2 | Aneurysm formation requiring endovascular treatment                                                              |
| 3 | Aneurysm formation requiring surgical repair                                                                     |

First column: 1 = mild level of severity, 2 = moderate level of severity, 3 = severe level of severity.

Second column: complications divided in levels of severity.
